# Supplementary material for: Shared Decision Making Enhances Pneumococcal Vaccination Rates in Adult Patients in Outpatient Care
Source: MDPI journal article supplement (doi:10.3390/ijerph17239146), 2020-12-07
Supplement: s1 [file s1]

### Supplement 1: SDM Assessment Tool

|                                                     | <b>Patient activation</b> | <b>Bi-directional exchange of information</b> | <b>Bi-directional deliberation of options</b> |
|-----------------------------------------------------|---------------------------|-----------------------------------------------|-----------------------------------------------|
| Full SDM Process                                    | 1                         | 1                                             | 1                                             |
| Unclear deliberation in SDM Process                 | 1                         | 1                                             | ?                                             |
| Unclear information and deliberation in SDM Process | 1                         | ?                                             | ?                                             |
| Unclear SDM Process                                 | ?                         | ?                                             | ?                                             |
| No SDM Process                                      | 0/?/1                     | 0/?/1                                         | 0                                             |

Criteria met = 1, criteria not met = 0, unclear = ?

Similar to Martinez-Gonzalez, et al 2018 [1].

1. Martinez-Gonzalez NA, Plate A, Senn O, Markun S, Rosemann T, Neuner-Jehle S. Shared decision-making for prostate cancer screening and treatment: a systematic review of randomised controlled trials. *Swiss medical weekly*. 2018;148:w14584.

## Supplement 2: Search strategy

Textword search strategy:

Columns are linked with AND, word in columns with OR.

|        |               |                      |                        |            |                  |
|--------|---------------|----------------------|------------------------|------------|------------------|
|        |               |                      | decision support       |            |                  |
|        |               |                      | joint decision         |            |                  |
|        |               |                      | choice                 |            |                  |
|        |               |                      | choice behaviour       |            |                  |
|        |               |                      | informed choice        |            |                  |
|        |               |                      | individual * decision  |            |                  |
|        |               |                      | provision of           |            |                  |
|        |               |                      | information cognitive  |            |                  |
|        |               |                      | empowerment            |            |                  |
|        |               | dialogu *            | patient                |            |                  |
|        |               | patient-provider     | empowerment            |            |                  |
|        |               | interpersonal        | informati *            |            |                  |
|        | pneumococc    | face-to-face         | risk communication     |            |                  |
|        | *             | face to face         | decision* coaching     |            |                  |
|        | shingles      | in person            | coaching               |            | controlled trial |
|        | herpes zoster | participative        | improve                |            | rct              |
|        | influenza     | communication-       | comprehensi *          |            | controlled       |
|        | flu           | based                | improve understand     |            | clinical trial   |
| Adult  | measles       | communication        | *                      | immune *   | randomized trial |
| *      | MMR           | based                | improve knowledge      | vaccin *   | randomized       |
| elderl | pertussis     | dialogue-based       | enhance comprehensi    | unvaccin * | controlled trial |
| *      | diphtheria    | dialogue based       | *                      | unimmune * | groups           |
| aged   | tetanus       | telephon *           | enhance understand *   |            | trial            |
|        | poliomyelitis | personal *           | enhance knowledge      |            | double blind     |
|        | polio         | individual *         | shared decision-       |            | random *         |
|        | rubella       | counsel *            | making                 |            |                  |
|        | mumps         | comunicati *         | shared decision        |            |                  |
|        | whooping      | professional-patient | making                 |            |                  |
|        | cough         | professional patient | shared                 |            |                  |
|        |               | interact*            | decisionmaking         |            |                  |
|        |               |                      | patient participation  |            |                  |
|        |               |                      | patient involvement    |            |                  |
|        |               |                      | participat * decision  |            |                  |
|        |               |                      | making                 |            |                  |
|        |               |                      | participat * decision- |            |                  |
|        |               |                      | making participat *    |            |                  |
|        |               |                      | decisionmaking         |            |                  |
|        |               |                      | informed consent       |            |                  |
|        |               |                      | individual choice      |            |                  |

Textword search strategy used for:

- Medline  
Search 2: +filter for CCT, RCT, review, systematic review
- Embase  
Search 2: +filter for CCT, RCT, systematic review
- CENTRAL
- PsycINFO
- ERIC

**Medline thesaurus search (2 February 2020) via ovid + Epub Ahead of Print, In-Process & Other Non-Indexed Citations, Daily and Versions**

Columns are linked with AND, word in columns with OR.

---

|                  |                                            |                                  |                                |                                  |
|------------------|--------------------------------------------|----------------------------------|--------------------------------|----------------------------------|
|                  |                                            | exp Informed Consent/            |                                |                                  |
|                  |                                            | exp Decision Support System/     |                                |                                  |
|                  |                                            | exp Diplomacy/                   |                                |                                  |
|                  |                                            | exp Decision Making/             |                                |                                  |
|                  | exp Professional Patient Relationship/     | exp Negotiating/                 |                                |                                  |
|                  | exp Patient Participation/                 | exp Patient Advocacy/            | exp Immunization/              |                                  |
|                  | exp Health Personnel Attitude/             | exp Consumer Health Information/ | exp Vaccination/               |                                  |
| exp Adult/       | exp Health Knowledge, Attitudes, Practice/ | exp Health Literacy/             | exp Vaccination Coverage/      |                                  |
| exp Young Adult/ | exp Patient Centered Care/                 | exp Medical Information/         | exp Vaccination Refusal/       | exp Randomized Controlled Trial/ |
|                  | exp Persuasive Communication/              | exp Attitude to Health/          | exp Anti-Vaccination Movement/ |                                  |
|                  | exp Interpersonal Communication/           | exp Information Seeking/         | exp Vaccine Hesitancy/         |                                  |
|                  | exp Health Communication/                  | exp Patient Attitude/            |                                |                                  |
|                  |                                            | exp Decision Support Technique/  |                                |                                  |
|                  |                                            | exp Patient Education/           |                                |                                  |

---

**Embase (2 February 2020) via ovid**

exp Adult/ or exp aged/  
 exp Professional Patient Relationship/ or exp Patient participation/ or exp Health Personnel Attitude/ or exp Health Knowledge, Attitudes, Practice/ or exp Patient Centered Care/ or exp Persuasive Communication/ or exp Health Communication/  
 exp Informed Consent/ or exp Decision Support System/ or exp Decision Making/ or exp Negotiating/ or exp Patient advocacy/ or exp Health Education/ or exp Consumer Health Information/ or exp Health Literacy/ or exp Medical Information/ or exp Attitude To Health/ or exp Information Seeking/ or exp Patient Attitude/ or exp Decision Support Technique/ or exp Patient Education/  
 exp Immunization/ or exp Vaccination/ or exp Vaccination Coverage/ or exp Vaccination refusal/ or exp Anti-Vaccination Movement/ or exp Vaccine hesitancy/  
 exp Randomized Controlled Trial/  
**Search 2:** + filter for RCT, controlled trial and systematic review

**PsycINFO thesaurus search (2 February 2020) via EBSCO**

DE "Immunization" AND (DE "Communication" OR DE "Interpersonal Communication" OR DE "Verbal Communication" OR DE "Persuasive Communication" OR DE "Interpersonal Influences" OR DE "Interpersonal communication" OR DE "Communication Skills" OR DE "Communication Skills Training" OR DE "Verbal Communication" OR DE "Electronic

Communication" OR DE "Interpersonal Interaction" OR DE "Conversation") AND (DE "Individual Education Program" OR DE "Individualized Instruction" OR DE "Client Participation" OR DE "Client Satisfaction" OR DE "Client Education" OR DE "Decision Making" OR DE "Choice Behavior" OR DE "Decision Theory" OR DE "Informed Consent" OR DE "Decision Support Systems")

**ERIC thesaurus search (2 February 2020) via EBSCO**

(DE "Adults" OR DE "Adult Students" OR DE "Older Adults" OR DE "Young Adults")  
AND (DE "Immunization Programs")  
AND (DE "Communication (Thought Transfer)" OR DE "Interaction" OR DE "Interpersonal Relationship" OR DE "Patient Education" OR DE "Counselling" OR DE "Discussion" OR DE "Interpersonal Communication" OR DE "Verbal Communication" OR DE "Communication Skills" OR DE "Counselor Client Relationship" OR DE "Physician Patient Relationship")  
AND (DE "Decision Making" OR DE "Informed Consent" OR DE "Health Education" OR DE "Participation" OR DE "Individualized Programs" OR DE "Decision Support Systems" OR DE "Participative Decision Making")

**CENTRAL thesaurus search (5 February 2020)**

Adult  
Immunization Vaccination  
Communication Health Communication Persuasive Communication Interpersonal Relations  
Professional-Patient Relations Physician-Patient Relations Counselling  
Decision Making, Shared Decision Making Clinical Decision Making, Decision Aids Decision Support Techniques Decision Support Systems, Clinical Informed Consent Choice Behavior Patient participation  
Randomized Controlled Trial

**PROSPERO search (5 February 2020)**

(vaccin\* OR unvaccine\* OR immun\* OR unimmun\*) AND (Intervention OR Systematic Review):RT AND (Care\_of\_the\_elderly OR education OR general\_interest OR Health inequalities/health equity OR Mental health and behavioural conditions OR Public health including social determinants of health OR Service delivery OR Social care):HA

**Clinicaltrials.gov search (5 February 2020)**

Status: All Studies  
Condition: vaccine OR vaccination OR immunization  
Other terms: decision making OR communication

**WHO search portal ICTRP search (5 February 2020)**

vaccination AND communication (search 1)  
immunization AND communication (search 2)  
**Resource Center** <http://www.nitag-resource.org/media-center/results?search=decision+making>  
(5 February 2020)  
Category: Systematic Review  
Search: communication
